# Supplementary material
Source: publisher figshare collection journal article supplement (https://acs.figshare.com/ndownloader/files/3924139)
Supplement: Supplementary file 1 [file 3924139]

## Supporting Information

### Texture and phase recognition analysis of $\beta$ -NaYF<sub>4</sub> nanocrystals

Valerio Voliani,<sup>\*,£,§,ç</sup> Mauro Gemmi,<sup>§</sup> Laura Francés-Soriano,<sup>ç</sup> Maria Gonzalez-Bejar,<sup>ç</sup> and Julia Pérez-Prieto<sup>\*,ç</sup>

£) NEST-Scuola Normale Superiore and Istituto Nanoscienze-CNR, Piazza San Silvestro 12, 56127 Pisa (Italy).

§) Center for Nanotechnology Innovation @NEST, Istituto Italiano di Tecnologia, Piazza San Silvestro 12, 56127 Pisa (Italy).

ç) Universidad de Valencia, Instituto de Ciencia Molecular, ICMol, Catedrático Jose Beltrán, 2, 46980 Paterna, Valencia (Spain).

Figure S1

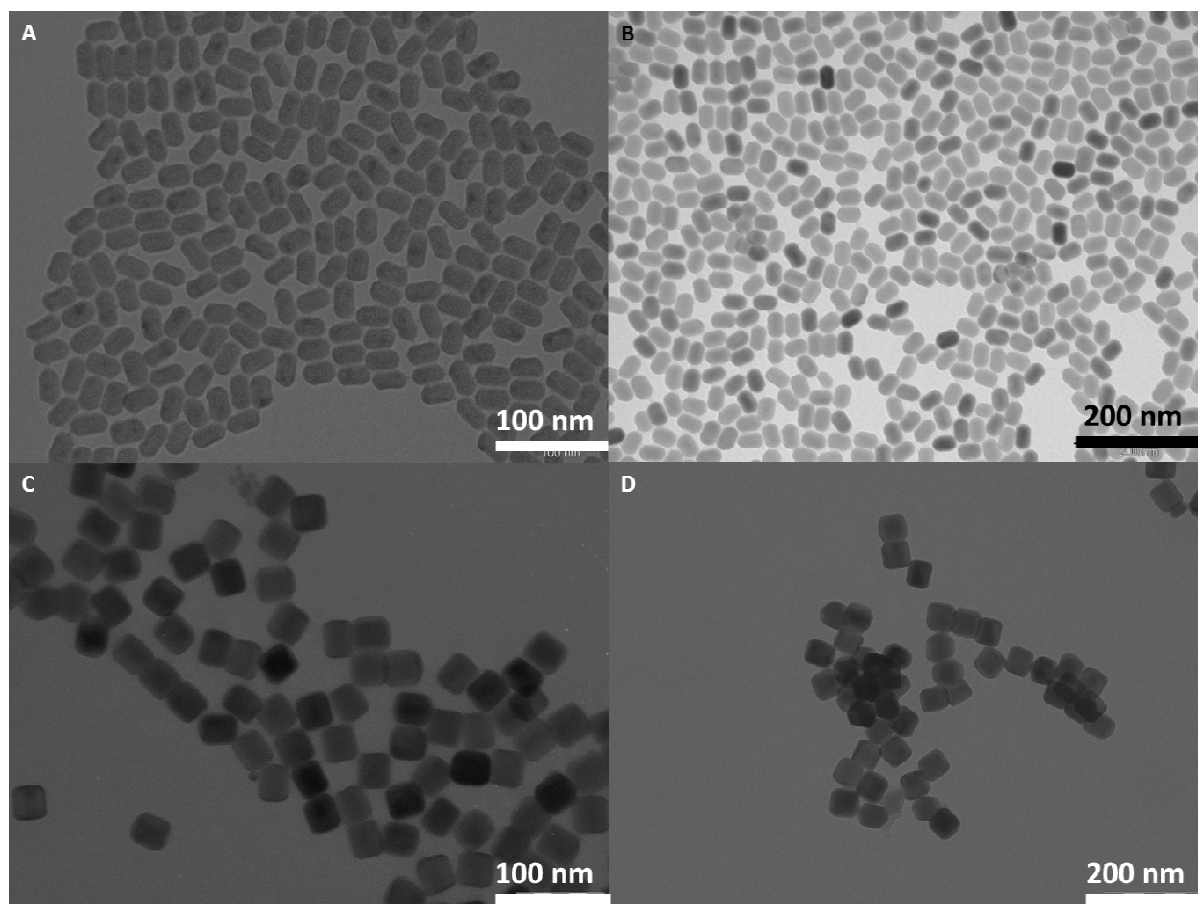

TEM images of the samples A) S1. B) S5. C) S10. D) S11.

Figure S2

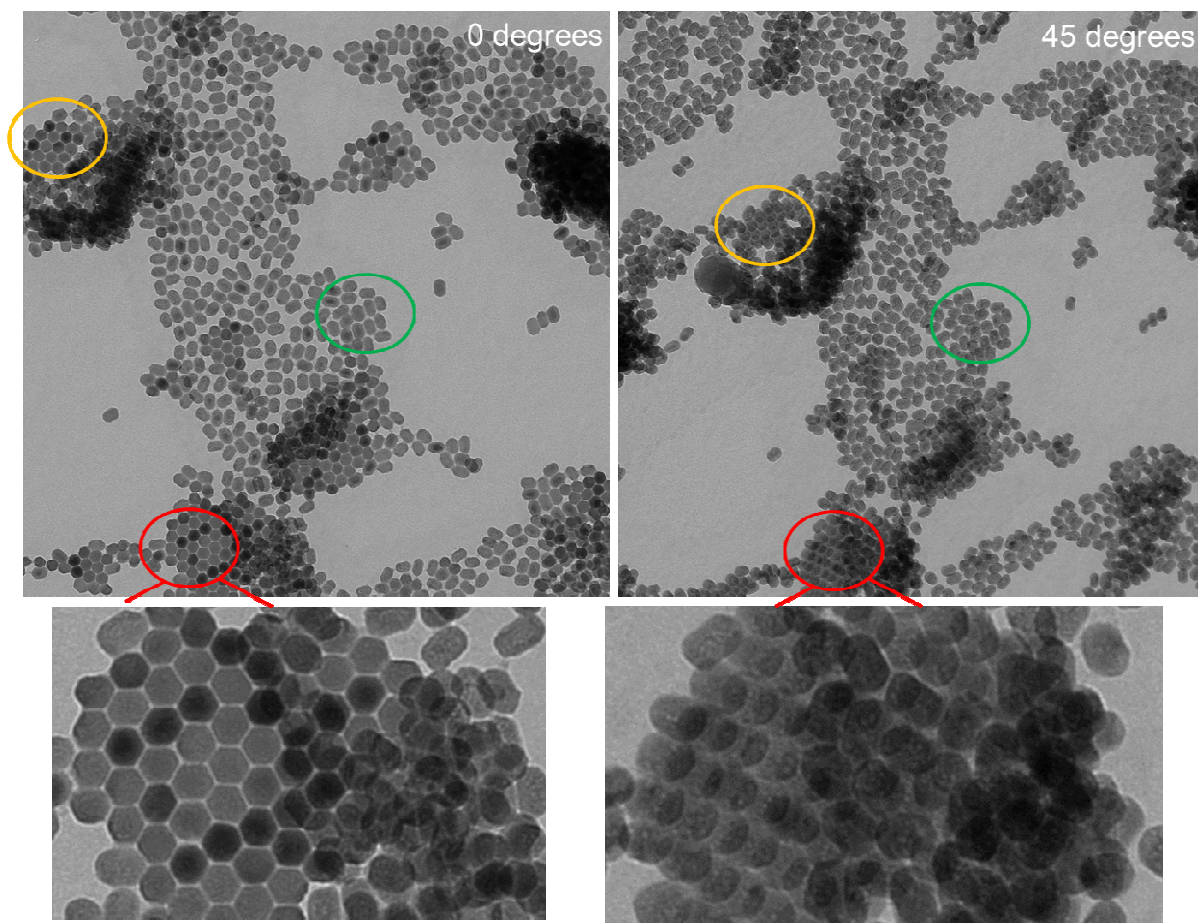

TEM images of the sample S5 tilted at 0 and 45 degree. In the three boxes, it is clearly visible that the hexagons display a rod shape after the tilting, while rods become hexagons at a right angle.

Figure S3

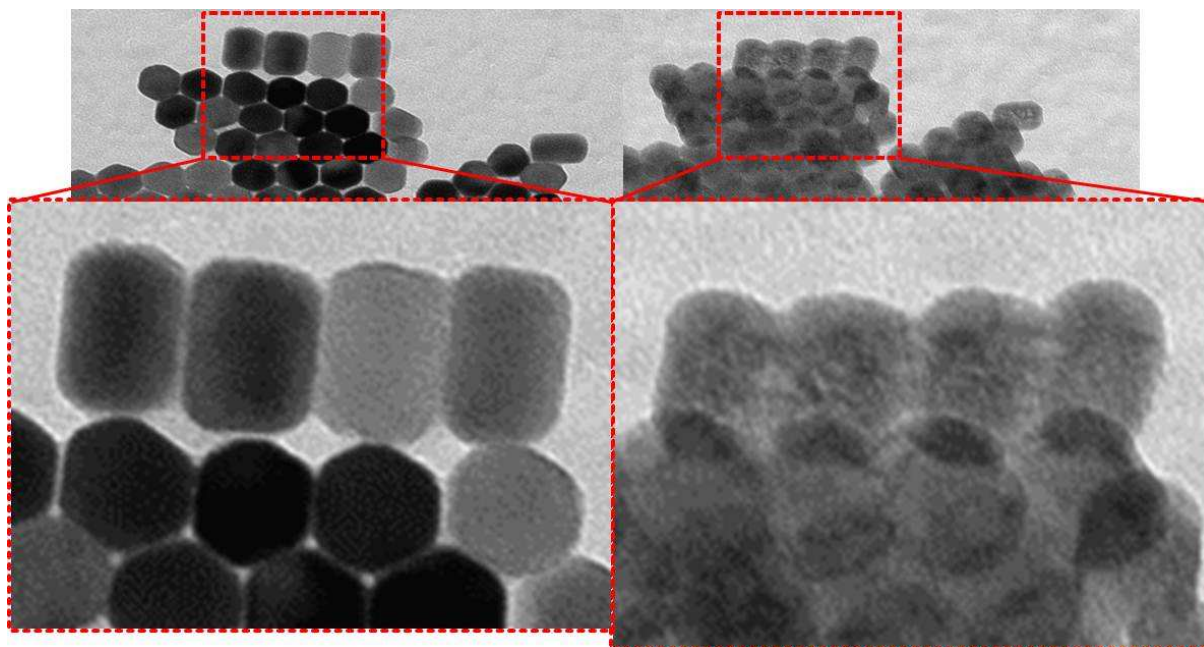

TEM images of the sample S5 tilted at 0 and 45 degree. In the zooms it is clearly visible that the hexagons display a rod shape after the tilting, while the rods become hexagons at a right angle.
